# Supplementary material
Source: publisher site journal article supplement (https://www.dovepress.com/article/486955)
Supplement: Supplementary file 1 [file get_supplementary_file.php]

# Supplementary Table S1. MRI acquisition protocol

| Parameters | T1WI | T2WI | T2WI  fat-suppressed sequence | Dynamic enhance T1WI |
| --- | --- | --- | --- | --- |
| Repetition time(ms) | 169 | 2000 | 2200 | 4.8 |
| Echo time(ms) | 4.76 | 90 | 90 | 2.3 |
| Flip angle(deg) | 70 | 140 | 140 | 10 |
| Matrix | 178×253 | 317×317 | 317×317 | 174×317 |
| Slice thickness(mm) | 6.0 | 6.0 | 6.0 | 3.0 |
| Field of view | 285×380 | 380×380 | 380×380 | 295×380 |
